# Supplementary material for: The fate of inhaled uranium-containing particles upon clearance to gastrointestinal tract
Source: Royal Society of Chemistry journal article supplement (doi:10.1039/d2em00209d), 2022-01-01
Supplement: d2em00209d1.pdf [file d2em00209d1.pdf]

**Supplementary Information for**  
**The Fate of Inhaled Uranium-Containing Particles upon Clearance to**  
**Gastrointestinal Tract**

**Eshani Hettiarachchi<sup>1</sup>, Milton Das<sup>1</sup>, Daniel Cadol<sup>2</sup>, Bonnie A. Frey<sup>3</sup>, and Gayan Rubasinghe<sup>1\*</sup>**

*1. Department of Chemistry, New Mexico Institute of Mining and Technology, 801, Leroy Place, Socorro, NM, 87801*

*2. Department of Earth & Environmental Sciences, New Mexico Institute of Mining and Technology, 801, Leroy Place, Socorro, NM, 87801*

*3. New Mexico Bureau of Geology and Mineral Resources, New Mexico Institute of Mining and Technology, 801, LeRoy Place, Socorro, NM, 87801*

**Table S1:** The compositions of the Simulated Gastrointestinal Fluids<sup>1</sup>

|                                 | Simulated Gastric Fluid | Simulated Intestinal Fluid |
|---------------------------------|-------------------------|----------------------------|
| <b>Sodium taurocholate (mM)</b> | 0.08                    | 3                          |
| <b>Lecithin (mM)</b>            | 0.02                    | 0.2                        |
| <b>Pepsin (mg/mL)</b>           | 0.1                     | -                          |
| <b>Sodium chloride (mM)</b>     | 34.2                    | 68.62                      |
| <b>Maleic acid (mM)</b>         | -                       | 19.12                      |
| <b>Sodium hydroxide</b>         | -                       | 34.8                       |
| <b>pH</b>                       | 1.6                     | 6.5                        |

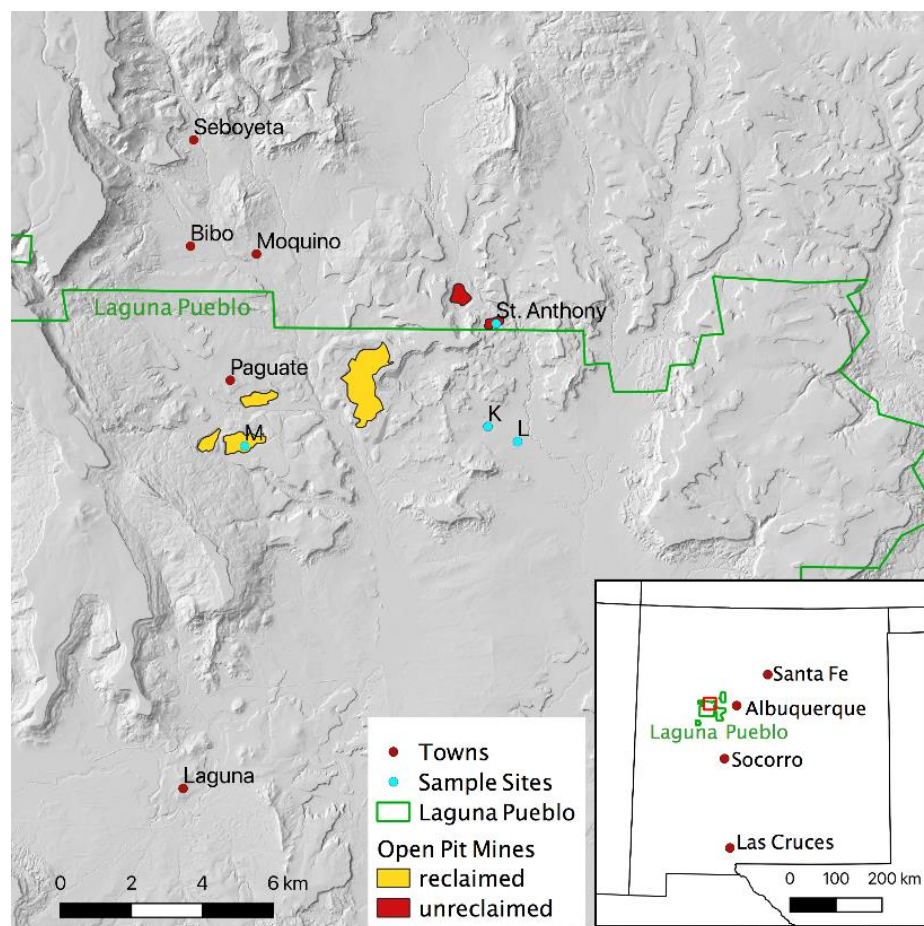

**Figure S1:** A map of the sampling area.

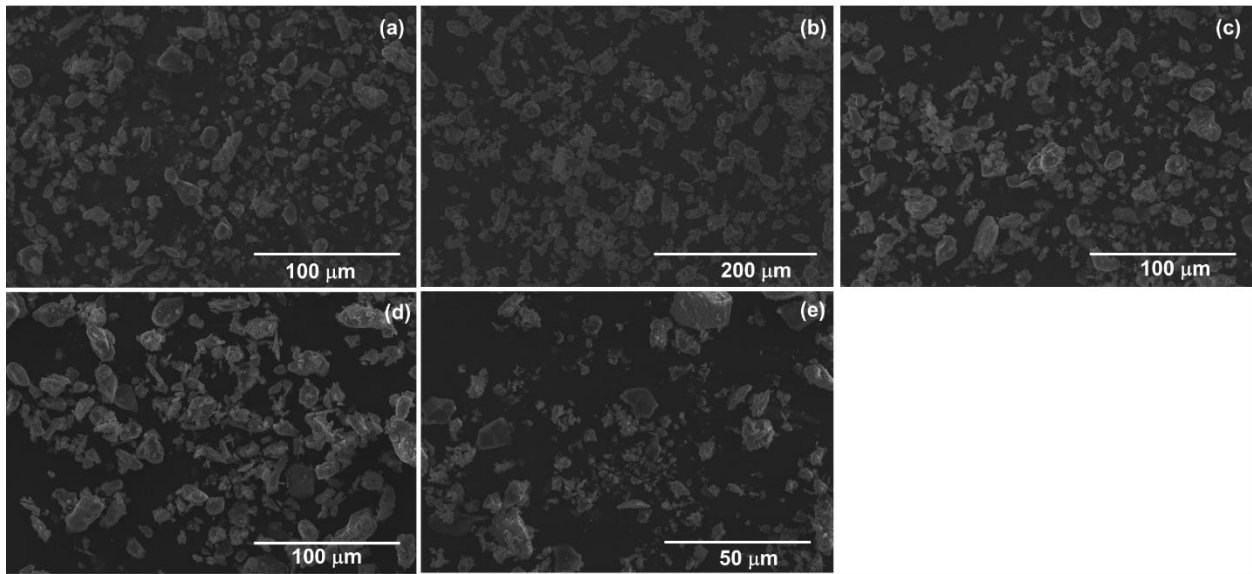

**Figure S2:** SEM images of the samples from (a) Site K (b) Site L (c) Site M (d) St. Anthony Mine sediment, and (e) St. Anthony rock

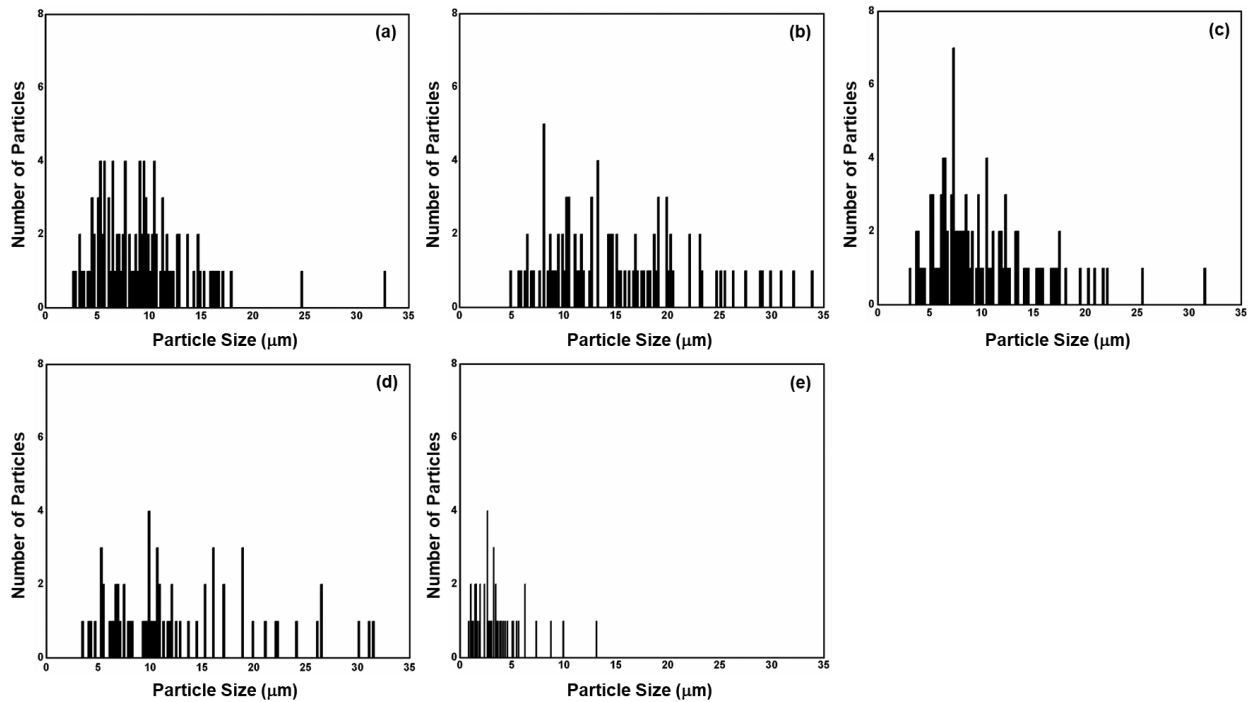

**Figure S3:** Particle-size distribution of the samples from (a) Site K (b) Site L (c) Site M (d) St. Anthony sediments, and (e) St. Anthony rock

## Computation Calculations – Input Files for the SGIF Solutions

### *SGF Solution*

PHASES

Uranophane

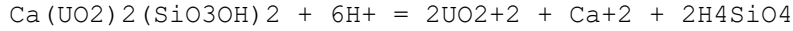

log\_k 17.49

delta\_h 0 kcal

-Vm 68.32 cm<sup>3</sup>/mol

PHASES

Coffinite

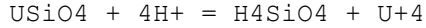

log\_k -7.62

delta\_h -14.548 kcal

-Vm 68.32 cm<sup>3</sup>/mol

SURFACE\_MASTER\_SPECIES

Uranophane Ca(UO<sub>2</sub>)<sub>2</sub>(SiO<sub>3</sub>OH)<sub>2</sub>

SURFACE\_MASTER\_SPECIES

Rutile TiO<sub>2</sub>

SURFACE\_MASTER\_SPECIES

Coffinite USiO<sub>4</sub>

Quartz SiO<sub>2</sub>

SURFACE\_SPECIES

SiO<sub>2</sub> = SiO<sub>2</sub>

log\_k -3.9993

delta\_h 32.949 kJ

SURFACE\_SPECIES

TiO<sub>2</sub> + 2.0000 H<sub>2</sub>O = + 1.0000 Ti(OH)<sub>4</sub>

log\_k -9.6452

delta\_h -226.107 kJ

PHASES

Uranyl\_carbonate

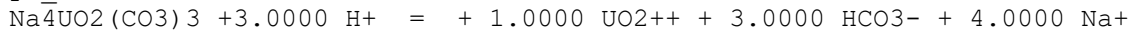

log\_k 4.0395

delta\_h 0 kcal

-Vm 68.32 cm<sup>3</sup>/mol

PHASES

Rutile

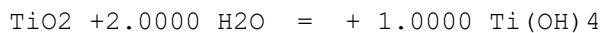

log\_k -9.6452

delta\_h -226.107 kcal

-Vm 68.32 cm<sup>3</sup>/mol

SURFACE\_MASTER\_SPECIES

Uranyl\_carbonate Na<sub>4</sub>UO<sub>2</sub>(CO<sub>3</sub>)<sub>3</sub>

SURFACE\_SPECIES

Na<sub>4</sub>UO<sub>2</sub>(CO<sub>3</sub>)<sub>3</sub> = Na<sub>4</sub>UO<sub>2</sub>(CO<sub>3</sub>)<sub>3</sub>

log\_k 0

SURFACE\_SPECIES

TiO<sub>2</sub> = TiO<sub>2</sub>

log\_k 0

PHASES

Microcline

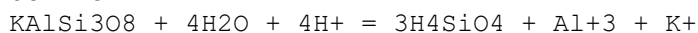

log\_k 0.616

delta\_h -12.309 kcal

SURFACE\_MASTER\_SPECIES

```

Microcline      KAlSi3O8
SURFACE_SPECIES
KAlSi3O8 = KAlSi3O8
  log_k      0
SOLUTION_MASTER_SPECIES
  Lactate      Lactate-      0      90.08      90.08
SOLUTION_MASTER_SPECIES
  Ti      Ti(OH)4      0      47.88      47.88

SOLUTION_MASTER_SPECIES
  Taurine      Taurine-      0      125.15      125.15
SURFACE_SPECIES
Ca(UO2)2(SiO3OH)2 = Ca(UO2)2(SiO3OH)2
  log_k      0
  delta_h      0 kJ
SOLUTION_SPECIES
Lactate- = Lactate-
  log_k      0
Lactate- + H+ = LactateH
  log_k      3.86
  delta_h      -1361.9 kJ
SOLUTION_SPECIES
Ti(OH)4 = Ti(OH)4
  log_k      0
SOLUTION_SPECIES
Taurine- = Taurine-
  log_k      0
H+ + Taurine- = TaurineH
  log_k      8.82

SOLUTION_MASTER_SPECIES
  Pyruvate      Pyruvate-      0      88.06      88.06
SOLUTION_SPECIES
Pyruvate- = Pyruvate-
  log_k      0
Pyruvate- + H+ = PyruvateH
  log_k      2.5
EQUILIBRIUM_PHASES 1
Autunite 0 0
Calcite 0 0
Carnotite 0 0
Coffinite 0 0
Dolomite(disordered) 0 0
Kaolinite 0 0
Microcline 0 0
Quartz 0 0
Schoepite 0 0
Torbernite 0 0
Tyuyamunite 0 0
Uraninite 0 0
Uranophane 0 0
Uranyl_carbonate 0 0
Rutile 0 0
SOLUTION 2
temp      37
pH      1.6
pe      4

```

```

redox      pe
units      mmol/l
density    1
Cl         34.2
Glycine    0.003
Na         34.28
P          0.02
Taurine    0.08
-water     0.1 # kg
GAS_PHASE 1
-fixed_volume
-equilibrium with solution 2
-pressure 1
-volume 1
-temperature 37
O2(g)      1
SURFACE_SPECIES
USiO4 = USiO4
log_k      0

```

### ***SIF Solution***

```

PHASES
Uranophane
Ca(UO2)2(SiO3OH)2 + 6H+ = 2UO2+2 + Ca+2 + 2H4SiO4
log_k      17.49
delta_h    0 kcal
-Vm        68.32 cm3/mol
PHASES
Coffinite
USiO4 + 4H+ = H4SiO4 + U+4
log_k      -7.62
delta_h    -14.548 kcal
-Vm        68.32 cm3/mol
SURFACE_MASTER_SPECIES
Uranophane Ca(UO2)2(SiO3OH)2
SURFACE_MASTER_SPECIES
Rutile TiO2
SURFACE_MASTER_SPECIES
Coffinite USiO4
Quartz SiO2
SURFACE_SPECIES
SiO2 = SiO2
log_k      -3.9993
delta_h    32.949 kJ
SURFACE_SPECIES
TiO2 +2.0000 H2O = + 1.0000 Ti(OH)4
log_k      -9.6452
delta_h    -226.107 kJ
PHASES
Uranyl_carbonate
Na4UO2(CO3)3 +3.0000 H+ = + 1.0000 UO2++ + 3.0000 HCO3- + 4.0000 Na+
log_k      4.0395
delta_h    0 kcal
-Vm        68.32 cm3/mol
PHASES

```

```

Rutile
  TiO2 +2.0000 H2O = + 1.0000 Ti(OH)4
  log_k      -9.6452
  delta_h    -226.107 kcal
  -Vm        68.32 cm3/mol
SURFACE_MASTER_SPECIES
  Uranyl_carbonate Na4UO2(CO3)3
SURFACE_SPECIES
Na4UO2(CO3)3 = Na4UO2(CO3)3
  log_k      0
SURFACE_SPECIES
TiO2 = TiO2
  log_k      0
PHASES
Microcline
  KAlSi3O8 + 4H2O + 4H+ = 3H4SiO4 + Al+3 + K+
  log_k      0.616
  delta_h    -12.309 kcal
SURFACE_MASTER_SPECIES
  Microcline      KAlSi3O8
SURFACE_SPECIES
KAlSi3O8 = KAlSi3O8
  log_k      0
SOLUTION_MASTER_SPECIES
  Lactate      Lactate-          0      90.08      90.08
SOLUTION_MASTER_SPECIES
  Malate      Malate-          0      116      116
SOLUTION_MASTER_SPECIES
  Ti          Ti(OH)4          0      47.88      47.88

SOLUTION_MASTER_SPECIES
  Taurine      Taurine-          0      125.15      125.15
SURFACE_SPECIES
Ca(UO2)2(SiO3OH)2 = Ca(UO2)2(SiO3OH)2
  log_k      0
  delta_h    0 kJ
SOLUTION_SPECIES
Lactate- = Lactate-
  log_k      0
Lactate- + H+ = LactateH
  log_k      3.86
  delta_h    -1361.9 kJ
SOLUTION_SPECIES
Malate- = Malate-
  log_k      0
H+ + Malate- = MalateH
  log_k      1.9
SOLUTION_SPECIES
Ti(OH)4 = Ti(OH)4
  log_k      0
SOLUTION_SPECIES
Taurine- = Taurine-
  log_k      0
H+ + Taurine- = TaurineH
  log_k      8.82

SOLUTION_MASTER_SPECIES

```

```

    Pyruvate      Pyruvate-      0      88.06      88.06
SOLUTION_SPECIES
Pyruvate- = Pyruvate-
  log_k      0
Pyruvate- + H+ = PyruvateH
  log_k      2.5
EQUILIBRIUM_PHASES 1
  Autunite  0 0
  Calcite   0 0
  Carnotite 0 0
  Coffinite 0 0
  Dolomite(disordered) 0 0
  Kaolinite 0 0
  Microcline 0 0
  Quartz    0 0
  Schoepite 0 0
  Torbernite 0 0
  Tyuyamunite 0 0
  Uraninite 0 0
  Uranophane 0 0
  Uranyl_carbonate 0 0
  Rutile    0 0
SOLUTION 2
  temp      37
  pH         6.5
  pe         4
  redox      pe
  units      mmol/l
  density    1
  Cl         34.2
  Glycine    0.003
  Malate     19.12
  Na         34.28
  P          0.02
  Taurine    0.08
  -water     0.1 # kg
GAS_PHASE 1
  -fixed_volume
  -equilibrium with solution 2
  -pressure 1
  -volume 1
  -temperature 37
  O2(g)      1
SURFACE_SPECIES
USiO4 = USiO4
  log_k      0

```



**Table S2:** Mineralogy Input to PHREEQC for the Computational Calculations.

| Mineral     | Chemical Formula                                                                                   | St. A. S | St. A. R | Site K | Site L | Site M |
|-------------|----------------------------------------------------------------------------------------------------|----------|----------|--------|--------|--------|
| Quartz      | SiO <sub>2</sub>                                                                                   | 99       | 99       | 99     | 99     | 99     |
| Dolomite    | CaCO <sub>3</sub> .MgCO <sub>3</sub>                                                               | 1        | 0        | 1      | 1      | 1      |
| Microcline  | KAlSi <sub>3</sub> O <sub>8</sub>                                                                  | 0        | 1        | 1      | 1      | 1      |
| Kaolinite   | Al <sub>2</sub> Si <sub>2</sub> O <sub>5</sub> (OH) <sub>4</sub>                                   | 1        | 1        | 1      | 1      | 1      |
| Calcite     | CaCO <sub>3</sub>                                                                                  | 0        | 0        | 0      | 0      | 0      |
| Rutile      | TiO <sub>2</sub>                                                                                   | 1        | 0        | 0      | 0      | 0      |
| Uraninite   | UO <sub>2</sub>                                                                                    | 0.01     | 0        | 0.7    | 0.8    | 0.8    |
| Coffinite   | U(SiO <sub>4</sub> ) <sub>1-x</sub> (OH) <sub>4x</sub>                                             | 0.01     | 1        | 0      | 0.4    | 0      |
| Andersonite | Na <sub>2</sub> Ca(UO <sub>2</sub> )(CO <sub>3</sub> ) <sub>3</sub> · 6H <sub>2</sub> O            | 0        | 0.45     | 0.0003 | 0      | 0      |
| Torbernite  | Cu(UO <sub>2</sub> ) <sub>2</sub> (PO <sub>4</sub> ) <sub>2</sub> · 12H <sub>2</sub> O             | 0        | 0.1      | 0      | 0.02   | 0.15   |
| Tyuyamunite | Ca(UO <sub>2</sub> ) <sub>2</sub> V <sub>2</sub> O <sub>8</sub> · (5-8)H <sub>2</sub> O            | 0        | 0        | 0.01   | 0.02   | 0.01   |
| Carnotite   | K <sub>2</sub> (UO <sub>2</sub> ) <sub>2</sub> (VO <sub>4</sub> ) <sub>2</sub> · 3H <sub>2</sub> O | 0        | 0.2      | 0.04   | 0      | 0      |
| Uranophane  | (Ca(UO <sub>2</sub> ) <sub>2</sub> (SiO <sub>3</sub> OH) <sub>2</sub> · 5H <sub>2</sub> O)         | 0.001    | 0.03     | 0.02   | 0.015  | 0      |
| Schoepfite  | (UO <sub>2</sub> ) <sub>8</sub> O <sub>2</sub> (OH) <sub>12</sub> · 12(H <sub>2</sub> O)           | 0.1      | 0        | 0      | 0      | 0      |
| Autunite    | Ca(UO <sub>2</sub> ) <sub>2</sub> (PO <sub>4</sub> ) <sub>2</sub> · 10–12H <sub>2</sub> O          | 0.08     | 1        | 0.2    | 0.15   | 0.25   |

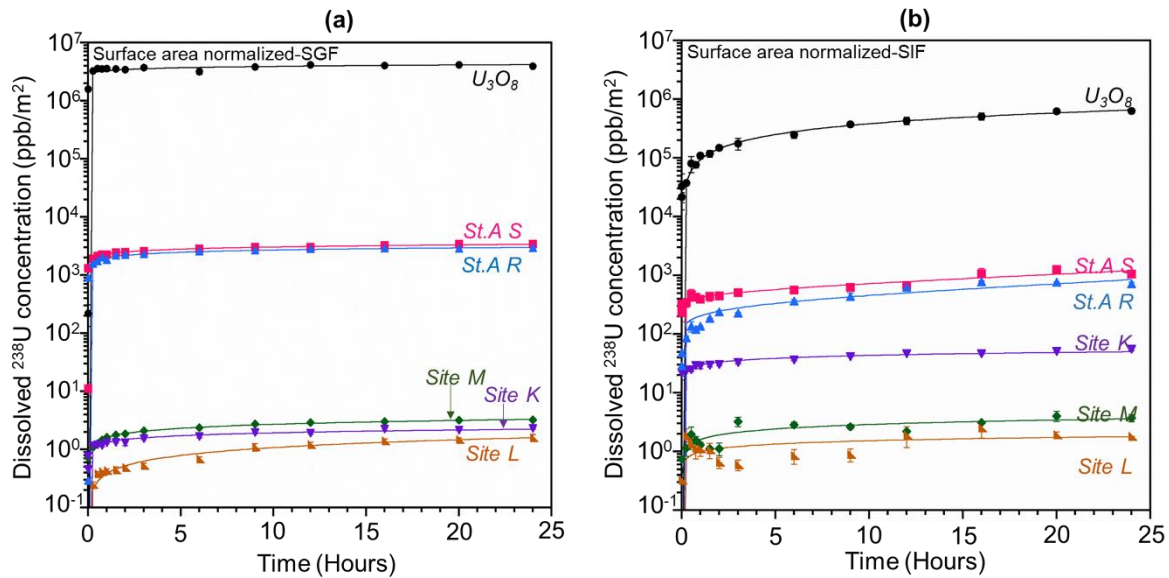

**Figure S4:** The surface-area-normalized dissolutions of uranium from natural dust and sediment samples in (a) SGF solution and (b) SIF solution

**Table S 3:** The ratio of %U normalized dissolved U in SGF to SIF after 24 hours of dissolution experiment.

| Sample                        | Dissolution ratio after 24 hours |
|-------------------------------|----------------------------------|
|                               | SGF/SIF                          |
| U <sub>3</sub> O <sub>8</sub> | 6.85                             |
| St.A. S                       | 4.20                             |
| St.A. R                       | 4.35                             |
| Site K                        | 0.06                             |
| Site L                        | 0.88                             |
| Site M                        | 0.53                             |

**Table S4:** Final pH (after 24 hours passed) of the dust-treated SGIF Solutions. The initial pH of the SGF solution is 1.60 and that of the SIF solution is 6.50.

| Sample                        | Final pH    |             |
|-------------------------------|-------------|-------------|
|                               | SGF         | SIF         |
| U <sub>3</sub> O <sub>8</sub> | 1.46 ± 0.05 | 6.42 ± 0.09 |
| STAS                          | 1.89 ± 0.06 | 6.02 ± 0.16 |
| STAR                          | 1.63 ± 0.05 | 5.93 ± 0.16 |
| Site K                        | 1.63 ± 0.04 | 6.28 ± 0.04 |
| Site L                        | 1.69 ± 0.06 | 6.12 ± 0.07 |
| Site M                        | 1.68 ± 0.09 | 6.23 ± 0.09 |

### Uranyl Cation Detection<sup>2</sup>

The colorimetric analysis of the Uranyl-Curcumin-Triton-X System was used to qualitatively determine (orange coloration) the presence of the uranyl cation (UO<sub>2</sub><sup>2+</sup>). Smaller quantities of dust in SGIF solutions did not show a visible color development. Therefore, to confirm the presence of

uranyl cation in dust-treated SGIF solutions, a higher quantity of dust (~50 mg in 3 mL of fluid) was treated for 24 hours using the same dissolution conditions.

**Table S5: Masses of natural dust and sediment samples used in uranyl cation detection.**

| Samples               | Amount in 3 mL of SGF (mg) | Amount in 3 mL of SIF (mg) |
|-----------------------|----------------------------|----------------------------|
| $U_3O_8$              | 50.21                      | 50.16                      |
| St. Anthony Sediments | 50.22                      | 50.89                      |
| St. Anthony Rock      | 50.53                      | 50.51                      |
| Site K                | 50.15                      | 51.17                      |
| Site L                | 47.19                      | 50.09                      |
| Site M                | 50.13                      | 50.67                      |

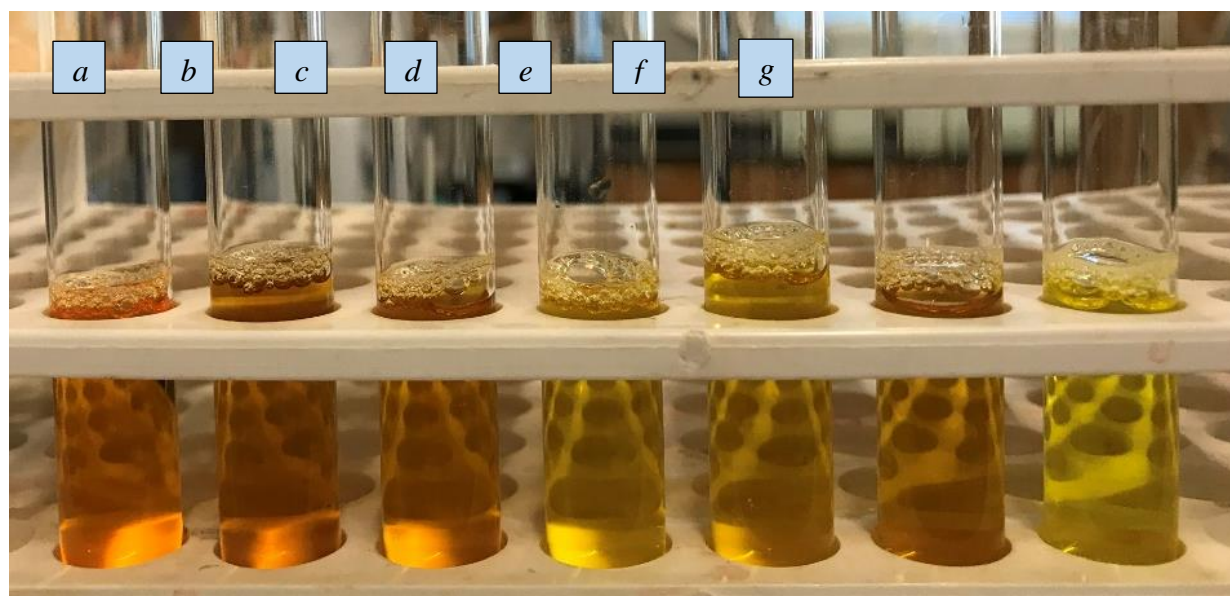

Figure S5: Orange coloration for Uranyl-Curcumin-Triton-X experiment for (a)  $U_3O_8$ , (b) St. Anthony sediment, (c) St. Anthony rock, (d) Site K, (e) Site L, and (f) Site M, while (g) is the Blank.

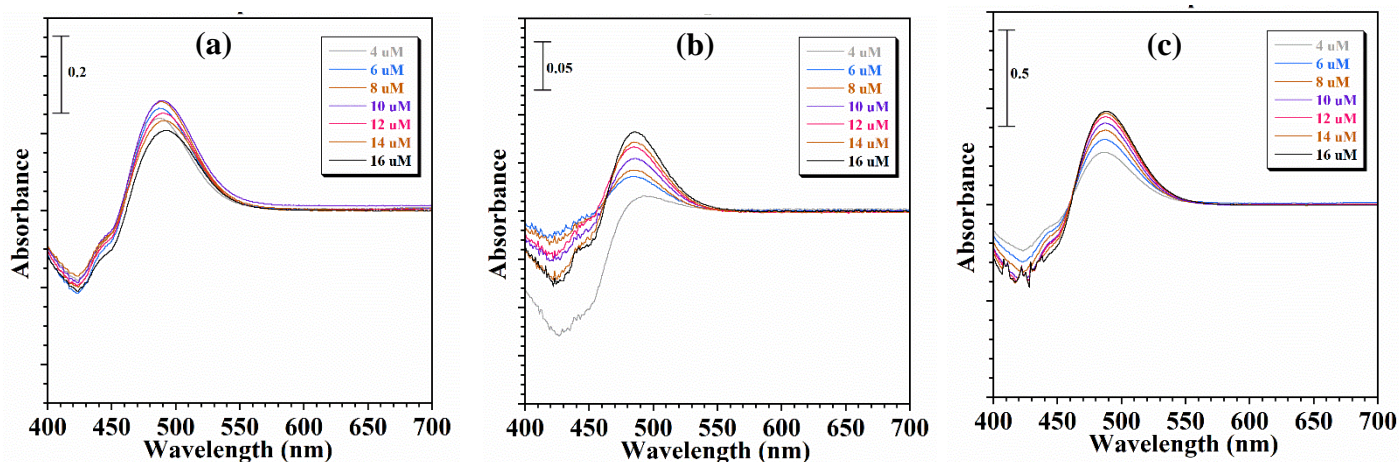

**Figure S6:** UV-VIS scanned spectra of uranyl-curcumin-triton-x system in (a) SGF, (b) SIF, & (c) water.

**Table S6: Calculated Equilibrium U Concentrations**

| Mineral                                      | Dissolved [U]/ M  |          |          |                |          |         |                 |          |         |
|----------------------------------------------|-------------------|----------|----------|----------------|----------|---------|-----------------|----------|---------|
|                                              | Without Kaolinite |          |          | With Kaolinite |          |         | With Microcline |          |         |
|                                              | SGF               | SIF      | SGF/SIF  | SGF            | SIF      | SGF/SIF | SGF             | SIF      | SGF/SIF |
| <b>Andersonite</b>                           | 6.76E-03          | 9.87E-03 | 0.68     | 6.76E-03       | 9.87E-03 | 0.68    | 1.00E-02        | 9.87E-03 | 1.01    |
| <b>Autunite</b>                              | 2.00E-02          | 5.53E-04 | 36.17    | 1.02E-02       | 5.58E-04 | 18.23   | 8.04E-04        | 5.43E-04 | 1.48    |
| <b>Carnotite</b>                             | 4.70E-03          | 8.51E-06 | 552.50   | 1.67E-04       | 8.89E-06 | 18.97   | 2.08E-06        | 1.12E-06 | 1.86    |
| <b>Coffinite</b>                             | 1.99E-09          | 1.88E-11 | 106.35   | 5.84E-11       | 1.87E-11 | 3.12    | 1.62E-11        | 2.46E-09 | 6.6E-03 |
| <b>Schoepite</b>                             | 1.00E-02          | 1.93E-05 | 518.14   | 9.99E-03       | 2.42E-05 | 412.42  | 2.44E-04        | 8.65E-06 | 28.26   |
| <b>Torbenite</b>                             | 2.00E-02          | 2.29E-04 | 87.41    | 3.48E-03       | 2.30E-04 | 15.10   | 2.61E-04        | 5.99E-04 | 0.43    |
| <b>Tyuyamunite</b>                           | 6.18E-03          | 7.49E-06 | 824.70   | 1.52E-04       | 7.96E-06 | 19.06   | 1.75E-06        | 1.10E-06 | 1.60    |
| <b>Uranophane</b>                            | 1.91E-02          | 5.93E-06 | 3216.34  | 1.91E-02       | 6.22E-06 | 3063.69 | 9.24E-05        | 6.22E-06 | 14.86   |
| <b>U<sub>3</sub>O<sub>8</sub></b>            | 1.44E-02          | 8.61E-06 | 1676.54  | 1.05E-03       | 9.08E-06 | 115.22  | 9.57E-06        | 7.32E-07 | 13.079  |
| <b>Uraninite</b>                             | 1.99E-09          | 1.89E-11 | 105.39   | 5.84E-11       | 1.72E-11 | 3.40    | 1.62E-11        | 2.46E-09 | 6.6E-03 |
| <b>For Natural dust and sediment samples</b> |                   |          |          |                |          |         |                 |          |         |
| <b>STS</b>                                   | 4.31E-03          | 9.41E-04 | 4.585371 | --             | --       | --      | --              | --       | --      |
| <b>STR</b>                                   | 5.81E-01          | 5.54E-01 | 1.04871  | --             | --       | --      | --              | --       | --      |
| <b>K</b>                                     | 6.95E-04          | 3.98E-03 | 0.174768 | --             | --       | --      | --              | --       | --      |
| <b>L</b>                                     | 9.24E-04          | 7.52E-03 | 0.123179 | --             | --       | --      | --              | --       | --      |
| <b>M</b>                                     | 7.29E-04          | 7.37E-03 | 0.098955 | --             | --       | --      | --              | --       | --      |

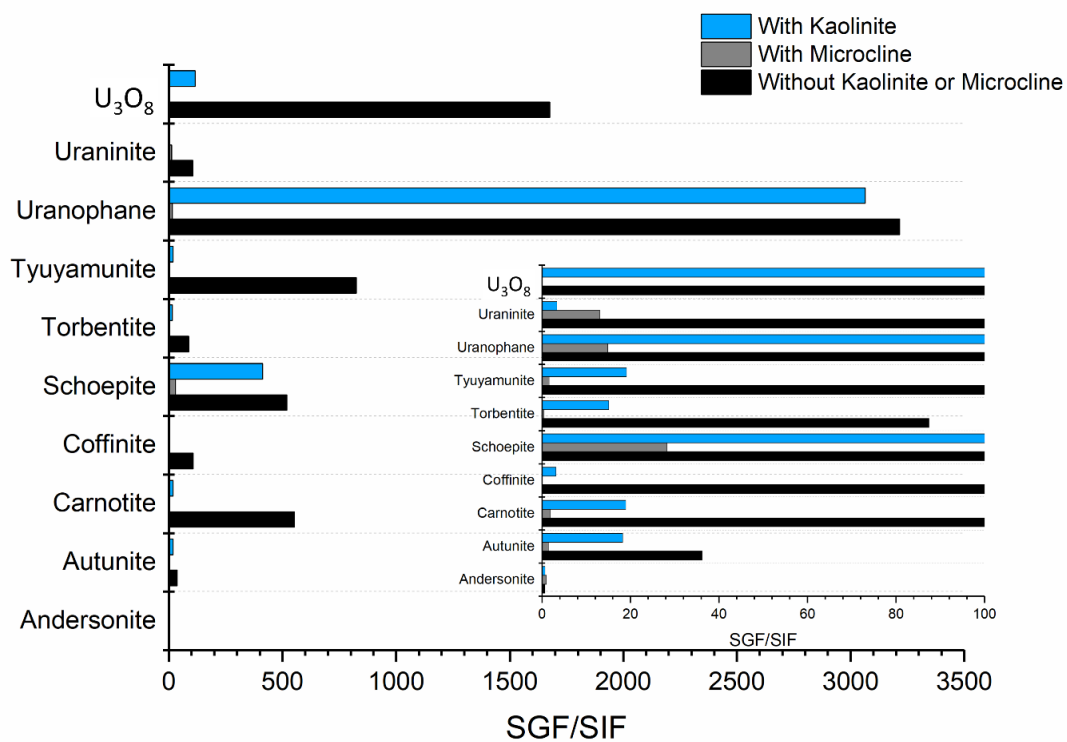

**Figure S7:** Single-phase uranium solubility ratio of SGF/SIF (a) with and without kaolinite (b) percent decrease in SGF/SIF ratio as a f(Kaolinite).

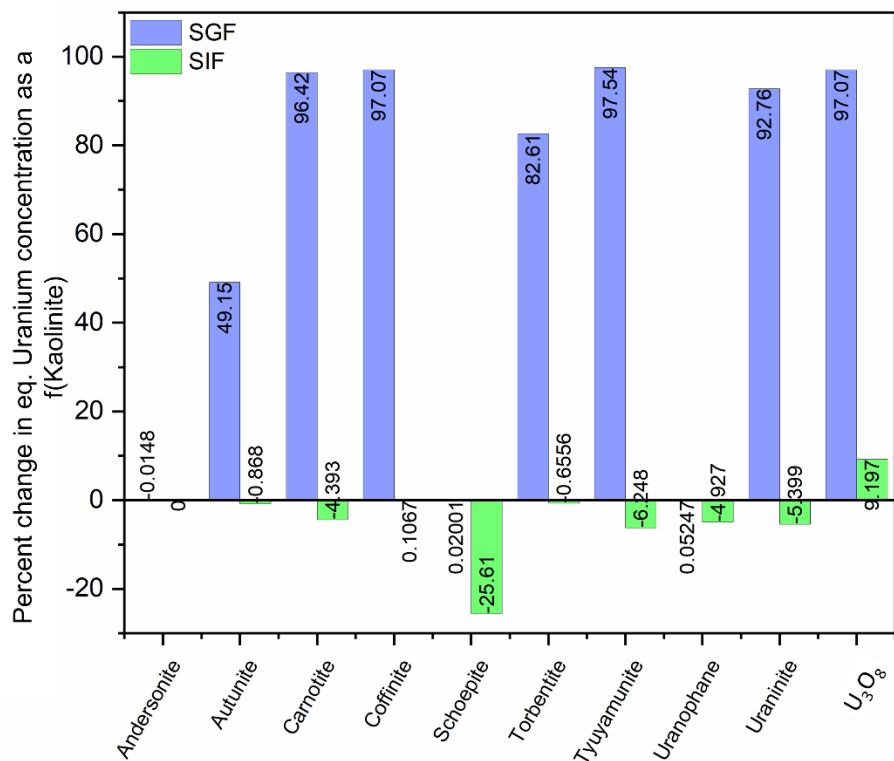

**Figure S8:** The percent change in uranium dissolution for each mineral in each fluid upon addition of kaolinite. The positive numbers indicate a decrease in concentration while the negative numbers indicate an increase in concentration.

## References

- (1) Marques, M. R. C.; Loebenberg, R.; Almukainzi, M. Simulated Biological Fluids with Possible Application in Dissolution Testing. *Dissolution Technol.* **2011**, *18* (3), 15–28. <https://doi.org/10.14227/DT180311P15>.
- (2) Zhu, J. H.; Zhao, X.; Yang, J.; Tan, Y. T.; Zhang, L.; Liu, S. P.; Liu, Z. F.; Hu, X. L. Selective Colorimetric and Fluorescent Quenching Determination of Uranyl Ion via Its Complexation with Curcumin. *Spectrochim. Acta - Part A Mol. Biomol. Spectrosc.* **2016**, *159*, 146–150. <https://doi.org/10.1016/j.saa.2016.01.021>.
